# Supplementary material for: Experiences of Treatment-Resistant Mental Health Conditions in Primary Care: A Systematic Review and Thematic Synthesis
Source: Research Square preprint supplement (doi:10.21203/rs.3.rs-1128086/v1), 2022-01-17
Supplement: Supplementary file 1 [file 5ea9a25170136ead94ab9438.xlsx]

## Sheet: Sheet1
Table One: Characteristics of Included Studies
Author/s (Years)	Region, Country	Condition/s	Definition of Treatment-Resistance	Context	Data Collection Method	Participants	Demographics	Analysis Method
Buss, N. (2004)	Southern Denmark	Depression/ Depressive Episode	Antidepressant prescription/ Depression Diagnosis/ Depression Inventory	Adherence to Antidepressants Primary Care	Longitudinal, Four Interviews	16	Age Range 29-38, Mean 50 10 Females, 6 Males	Thematic
Finucane, A. et al. (2006)	Ayrshire, Scotland, UK	Recurrent Depression or Recurrent Depression and Anxiety	Depression Inventory, Current History of Recurrent Depression	Mindfulness, Primary Care	Interviews	13	Age Range 29-38, Mean 43 10 Females, 3 Males	Framework with Thematic Matrixes
Hansen, MC. et al. (2012)	Los Angeles, California, USA	Diabetes, Major Depression	Depression Inventory	Pathways to Care	Interviews, Focus Groups	14 Interviews, 19 Participants in Focus Groups	All Spanish Speaking Latinos Mean Age 57 16 Females, 3 Males 12 Health Insurance, 7 No Insurance 18 Mexicans, 1 Peruvian	Grounded Theory
Ho, S. et al. (2017)	Malaysia	Major Depression	Major Depression, Diagnosis, Depression Inventory, Taking Any Class of Oral Antidepressants >6 Months	Outpatients from Psychiatric Hospital Barriers and Facilitators of Medication Adherence	Interviews	30	Age Range 27-59, Mean 45.2 15 Females, 15 Males 10 Malay, 10 Chinese, 10 Indian Hypertension 7, Diabetes 2, Asthma 3, Cardiovascular Disease 3, Other 4	Thematic
Johnston, O. et al. (2007)	Southhampton, UK	Depression (including recurrent and persistent)	Self-Description	General Practice	Interviews	61	Age Range 18-83 44 Females, 17 Males 58 White, 1 Black Caribbean, 1 Pakistani, 1 Chinese 34 Paid Employment, 27 Unemployed	Grounded Theory
Kadam, UT. et al. (2001)	UK	Anxiety, Depression	Depression Inventory	Views of Anxiety and Depression	Interviews, Focus Groups	27	Age Range 31-69, Mean 53 18 Females, 9 Males	Grounded Theory
Kessler, D. et al. (2018)	UK	Treatment-Resistant Depression	Depression Inventory, Depression For >6 Weeks and Taking Antidepressants	Medication Adherence	Interviews, Focus Groups	23	Age Raneg 27-76 15 Females, 8 Males	Thematic
Nicolaidis, C. et al. (2010)	Portland, Oregon, USA	Major Depression	Depression Inventory	Racial Inequity in relation to healthcare	Focus Groups, Participatory Action	30	All African or African American All Women Age Range 19-53 Mean 36.2 All Low Income (67% Earn Less Than $16k) Medicare 37%, No Insurance 40%	Thematic
Nussbaumer-Streit, B. et al, (2018)	Vienna, Austria	Seasonal Effective Disorder	History of Seasonal Effective Disorder.	Prevention of Seasonal Depression	Interviews	10	Age Range 20-60 4 Females, 6 Males	Thematic
Reynolds, K. et al. (2020)	Canada	Persistent Moderate to Severe Depression	Pursuing Outpatient Psychological Treatment at Tertiary Clinic.	Barriers to Care	Interviews	15	Age Range 61-86, Mean 72 11 Females, 4 Males	Narrative
Wiles, N. et al. (2018)	Bristol, Exeter, Glasgow UK	Anxiety, Treatment-Resistant Depression	Depression Inventory Taking Antidepressants at An Adequate Dose for >6 Weeks	Primary Care	Interviews	14	Age Range 18-75, Mean 45 10 Females, 4 Males 14 Secondary Diagnosis of Anxiety 6 >GCSE, 8 <A Levels 6 Paid Employment, 8 Not in Paid Employment 8 Homeowner, 6 Non-Homeowner	Thematic Framework Analysis
