# Supplementary material for: Experiences of Treatment-Resistant Mental Health Conditions in Primary Care: A Systematic Review and Thematic Synthesis
Source: Research Square preprint supplement (doi:10.21203/rs.3.rs-1128086/v1), 2022-01-17
Supplement: Supplementary file 3 [file 8c697b9bc5b90c50b5ddf4cd.xlsx]

## Sheet: Sheet1
Table 3: Distribution of Descriptive Themes
Author (Year)	Descriptive Theme
	Barriers and Crisis Point	Seeing a GP	Treatment	Self-Management	Total
Buss, N. (2004)	✓	✓	✓	✓	4
Finucane, A. et al. (2006)			✓		1
Hansen, MC. et al. (2012)	✓	✓	✓	✓	4
Ho, S. et al. (2017)	✓	✓	✓	✓	4
Johnston, O. et al. (2007)		✓	✓		2
Kadam, UT. et al. (2001	✓	✓	✓	✓	4
Kessler, D. et al. (2018)	✓	✓	✓		3
Nicolaidis, C. et al. (2010)	✓	✓	✓	✓	4
Nussbaumer-Streit, B. et al. (2018)	✓	✓	✓		3
Reynolds, K. et al. (2020)	✓	✓	✓		3
Wiles, N. et al. (2018)		✓	✓	✓	3
Total	8	10	11	6
